# Supplementary material for: Controlling the product selectivity in the conversion of methanol to the feedstock for phenol production
Source: Royal Society of Chemistry journal article supplement (doi:10.1039/c9ra03723c), 2019-01-01
Supplement: c9ra03723c1.pdf [file c9ra03723c1.pdf]

## Appendix

Table A1 Catalytic performance of Si/HZSM-5, Zn/HZSM-5, and Zn/Si/HZSM-5 catalysts

|                                                            | Catalysts                                                                                             | Aromatics (wt%) | B (wt%)    | T (wt%)     | X (wt%)     | p-X/X (wt%) | P (wt%)     | Alkenes (wt%) | Alkanes (wt%) | P/BT (Molar ratio) | Reaction condition                                                                                                | Sample time (h) | Ref. |
|------------------------------------------------------------|-------------------------------------------------------------------------------------------------------|-----------------|------------|-------------|-------------|-------------|-------------|---------------|---------------|--------------------|-------------------------------------------------------------------------------------------------------------------|-----------------|------|
| Zn-modified HZSM-5 catalysts                               | 5 wt% Zn/HZSM-5 (HZSM-5 SiO <sub>2</sub> /Al <sub>2</sub> O <sub>3</sub> = 38)                        | 56.6 (36.3)     | 2.0 (2.3)  | 17.7 (12.0) | 24.4 (13.9) | 24.2 (23.7) | 2.2 (1.2)   | 5.4 (2.9)     | 23.3 (43.7)   | 0.2 (0.2)          | 420 °C, 0.1 MPa, weight hourly space velocity (WHSV) = 2.1 h <sup>-1</sup> , N <sub>2</sub> flow rate = 30 ml/min | 4               | 9    |
|                                                            | 1.5wt% Zn/HZSM-5 (HZSM-5 SiO <sub>2</sub> /Al <sub>2</sub> O <sub>3</sub> = 38)                       | 50.9 (27.7)     | 2.3 (2.8)  | 9.5 (8.6)   | 26.9 (10.0) | 72.4 (69.5) | 4.8 (3.6)   | 11.5 (7.5)    | 14.3 (41.0)   | 0.9 (0.7)          | 475 °C, 0.1 MPa, WHSV = 1 h <sup>-1</sup> , N <sub>2</sub> flow rate = 30.8 ml/min                                | 2.25            | 10   |
|                                                            | 1 wt% Zn/HZSM-5 (HZSM-5 SiO <sub>2</sub> /Al <sub>2</sub> O <sub>3</sub> = 60)                        | 49.5 (24.8)     | 4.0 (1.6)  | 17.8 (6.7)  | 21.1 (11.7) | n.a.        | 14.4 (22.1) | 31.1 (39.5)   | 10.3 (27.9)   | 1.4 (5.6)          | 450 °C, 0.1 MPa, WHSV = not given, N <sub>2</sub> flow rate = 88 ml/min                                           | 12              | 11   |
|                                                            | 1 wt% Zn/HZSM-5 (HZSM-5 SiO <sub>2</sub> /Al <sub>2</sub> O <sub>3</sub> = 30)                        | 65.9 (38.4)     | 4.9 (2.1)  | 14.9 (5.6)  | 25.9 (14.1) | 24.1 (23.5) | 2.1 (2.3)   | 4.6 (5.4)     | 26.0 (48.8)   | 0.2 (0.6)          | 460 °C, 0.1 MPa, WHSV = 1 h <sup>-1</sup> , N <sub>2</sub> flow rate = 80 ml/min                                  | 0.5             | 13   |
| Silica deposited HZSM-5 catalysts                          | SiO <sub>2</sub> /HZSM-5 (HZSM-5 SiO <sub>2</sub> /Al <sub>2</sub> O <sub>3</sub> = 30)               | 33.8 (38.4)     | 8.3 (2.1)  | 10.2 (5.6)  | 12.8 (14.1) | 97.3 (23.5) | 4.3 (2.3)   | 8.9 (5.4)     | 49.7 (48.8)   | 0.5 (0.6)          | 460 °C, 0.1 MPa, WHSV = 1 h <sup>-1</sup> , N <sub>2</sub> flow rate = 80 ml/min                                  | 0.5             | 13   |
|                                                            | SiO <sub>2</sub> /HZSM-5 (HZSM-5 SiO <sub>2</sub> /Al <sub>2</sub> O <sub>3</sub> = 50)               | 27.4 (37.5)     | 7.0 (7.9)  | 8.9 (9.5)   | 9.5 (12.5)  | 98.1 (24.0) | 14.0 (0.7)  | 36.3 (2.3)    | 34.4 (59.5)   | 1.8 (0.1)          | 400 °C, 0.1 MPa, WHSV = 1 h <sup>-1</sup> , N <sub>2</sub> flow rate = 40 ml/min                                  | 0.5             | 16   |
|                                                            | SiO <sub>2</sub> /HZSM-5 (HZSM-5 SiO <sub>2</sub> /Al <sub>2</sub> O <sub>3</sub> = 200)              | 23.1 (35.4)     | 5.9 (8.3)  | 7.0 (9.8)   | 8.8 (12.3)  | 96.3 (24.2) | 28.2 (6.5)  | 55.4 (11.9)   | 18.3 (50.7)   | 4.4 (0.7)          |                                                                                                                   |                 |      |
| Zn-modified Si/ HZSM-5                                     | 0.73 wt% Zn/HZSM-5/SiO <sub>2</sub> (Si/HZSM-5 SiO <sub>2</sub> /Al <sub>2</sub> O <sub>3</sub> = 28) | 36.6 (27.4)     | 0.8 (1.2)  | 11.0 (8.1)  | 18.8 (12.9) | 94.8 (93.2) | n.a.        | n.a.          | n.a.          | n.a.               | 450 °C, 0.1 MPa, WHSV = 2.3 h <sup>-1</sup>                                                                       | 2               | 12   |
|                                                            | 1 wt% Zn/Si/HZSM-5 (Si/HZSM-5 SiO <sub>2</sub> /Al <sub>2</sub> O <sub>3</sub> = 30)                  | 59.8 (33.8)     | 14.2 (8.3) | 18.6 (10.2) | 22.7 (12.8) | 97.8 (97.3) | 3.4 (4.3)   | 6.7 (8.9)     | 27.7 (49.7)   | 0.2 (0.5)          | 460 °C, 0.1 MPa, WHSV = 1 h <sup>-1</sup> , N <sub>2</sub> flow rate = 80 ml/min                                  | 0.5             | 13   |
|                                                            | 3 wt% ZnO/Si/HZSM-5 (Si/HZSM-5 SiO <sub>2</sub> /Al <sub>2</sub> O <sub>3</sub> = 25)                 | 28.8 (n.a.)     | n.a.       | n.a.        | n.a.        | 86.6 (n.a.) | 8.8 (n.a.)  | n.a.          | n.a.          | n.a.               | 475 °C, 0.1 MPa, WHSV = 0.79 h <sup>-1</sup>                                                                      | 0.5             | 14   |
| The methanol conversion is ~100% over all these catalysts. |                                                                                                       |                 |            |             |             |             |             |               |               |                    |                                                                                                                   |                 |      |
